# Supplementary material for: Preparation of mesoporous SiO2/Bi2O3/TiO2 superhydrophilic thin films and their surface self-cleaning properties
Source: Royal Society of Chemistry journal article supplement (doi:10.1039/c6ra26078k), 2017-01-01
Supplement: c6ra26078k1.pdf [file c6ra26078k1.pdf]

## Supplementary Material

# Preparation of mesoporous SiO<sub>2</sub>/Bi<sub>2</sub>O<sub>3</sub>/TiO<sub>2</sub> superhydrophilic thin films and their surface self-cleaning properties

Zhaogao Bai,<sup>a</sup> Yun Hu,<sup>\*abc</sup> Shuqin Yan,<sup>a</sup> Wenjie Shan<sup>a</sup> and Chaohai Wei<sup>ab</sup>

<sup>a</sup> School of Environment and Energy, South China University of Technology,,  
Guangzhou 510006, P. R. China

<sup>b</sup> Guangdong Provincial Engineering and Technology Research Center for  
Environmental Risk Prevention and Emergency Disposal, Guangzhou 510006, P. R.  
China

<sup>c</sup> Guangdong Provincial Key Laboratory of Atmospheric Environment and Pollution  
Control, Guangzhou 510006, P. R. China

\*Corresponding author. Tel: +86-20-39380573; E-mail address: huyun@scut.edu.cn  
(Y. Hu)

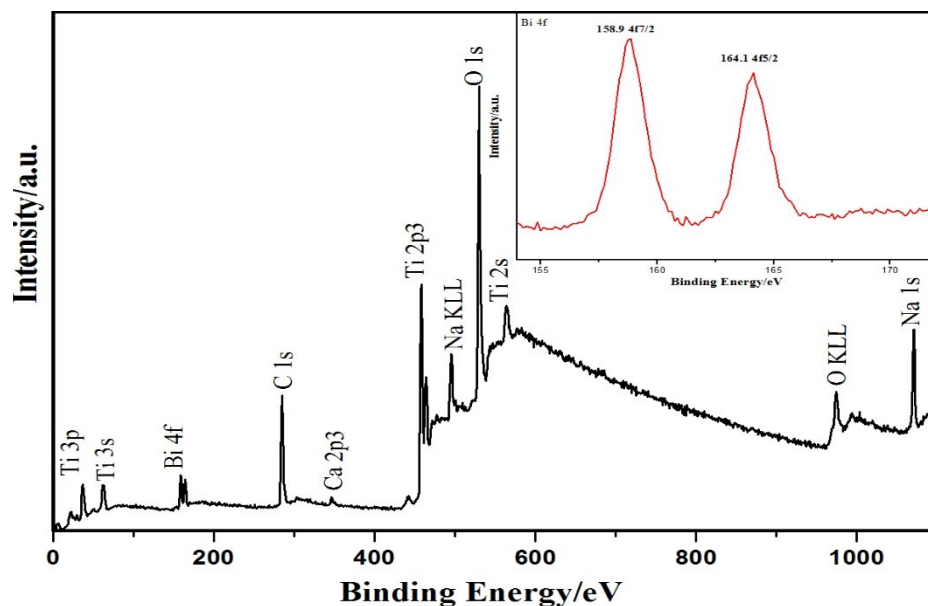

Fig. S1 XPS spectra of 5%Bi<sub>2</sub>O<sub>3</sub>-TiO<sub>2</sub> thin films (the inset is the XPS spectra of Bi 4f)

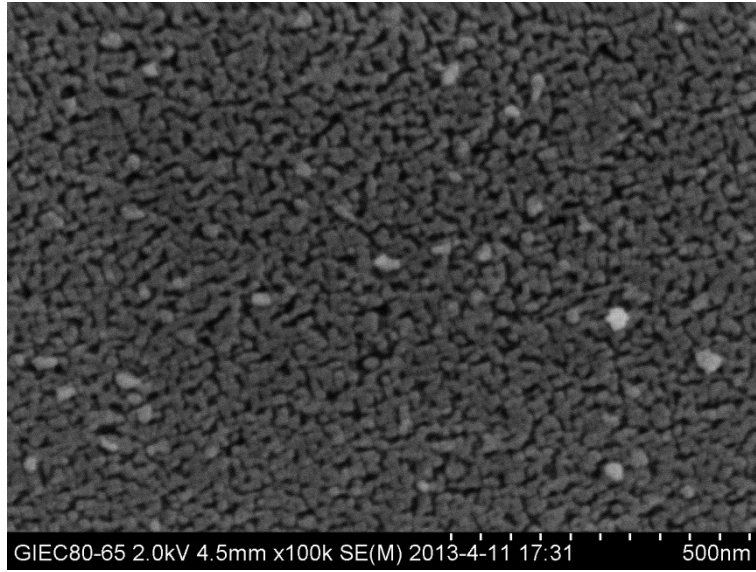

Fig. S2 SEM image of T/B

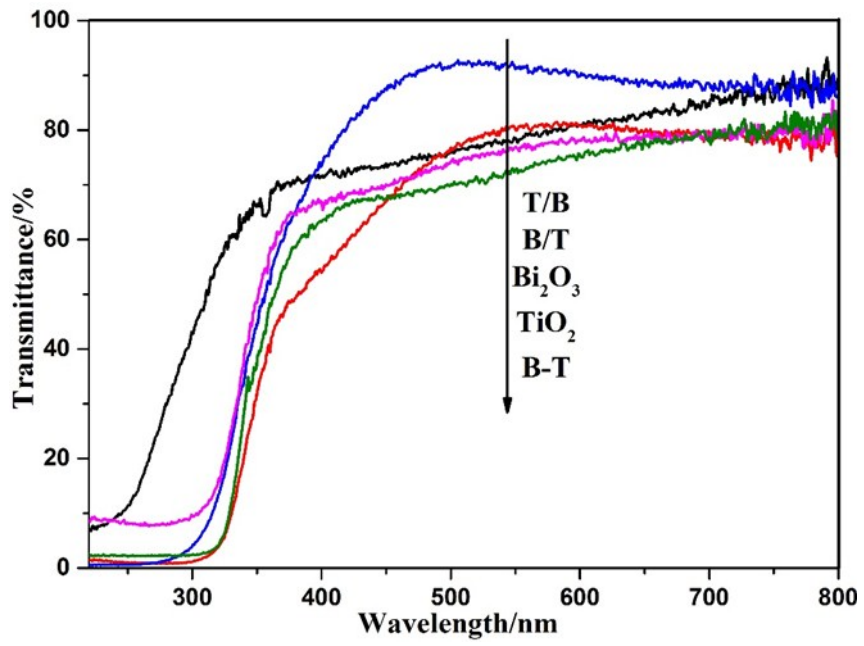

Fig. S3 UV-Vis transmittance spectra of the multilayered thin films

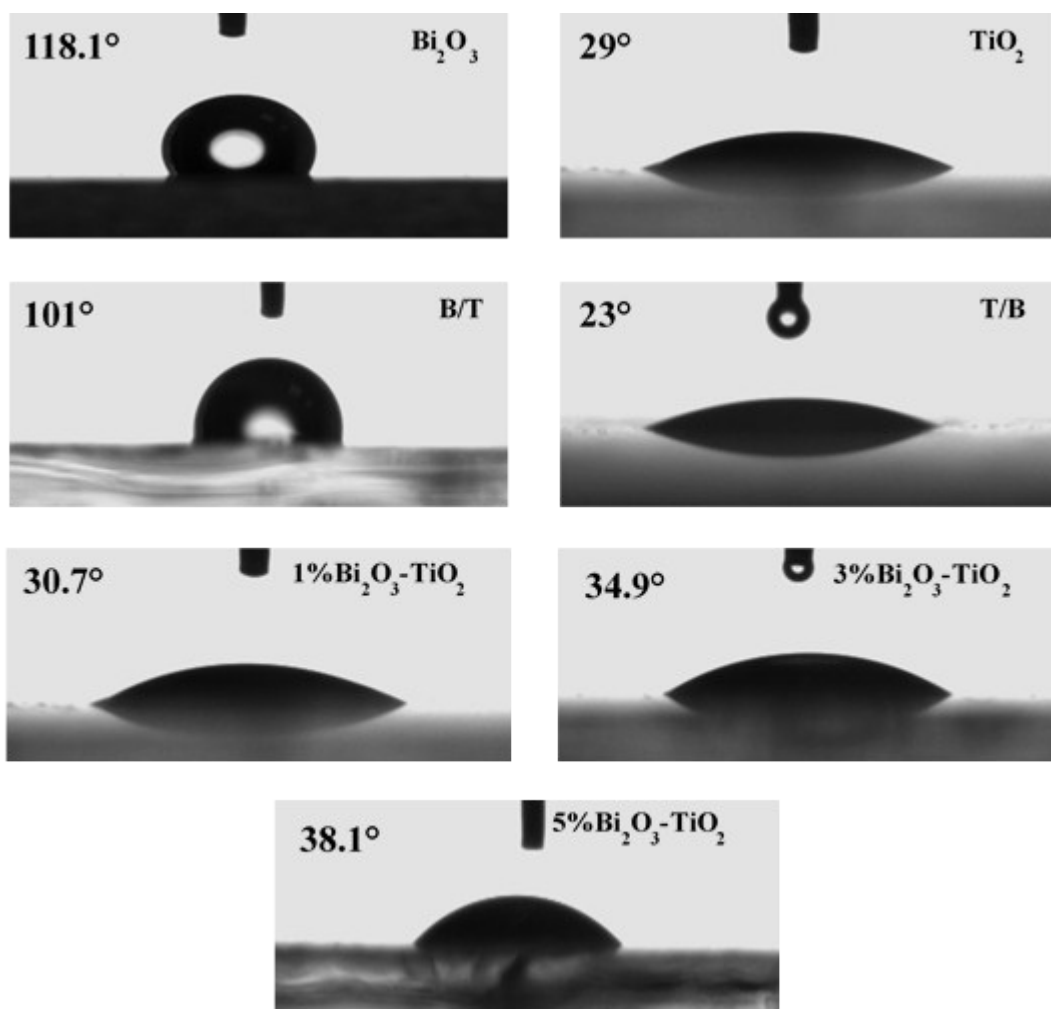

Fig. S4 The images of contact angles of a water droplet on thin films in the dark

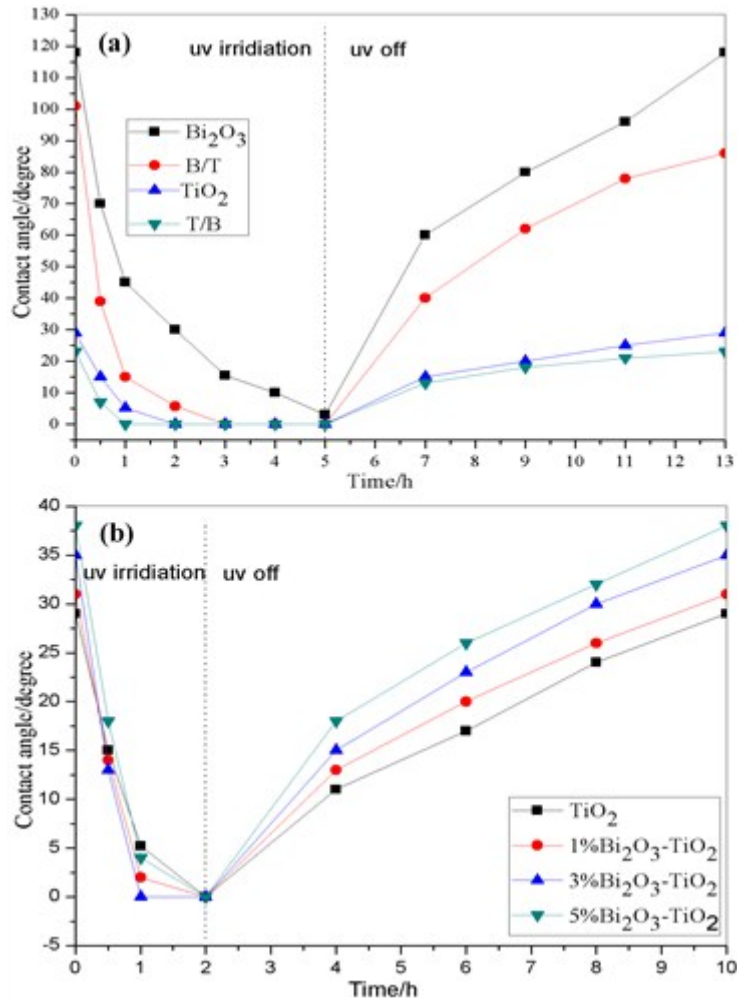

Fig. S5 Changes in the contact angle of a water droplet on the thin films with the UV irradiation time

Table S1 Photocatalytic activity of the thin films with different layers for degradation of methyl orange under UV irradiation

| Upper layer<br>Degradation<br>rate<br>Under layer | B(1) | B(3) | B(6) |
|---------------------------------------------------|------|------|------|
|                                                   | T(1) | 36%  | 38%  |
| T(3)                                              | 39%  | 43%  | 41%  |
| T(6)                                              | 37%  | 40%  | 39%  |

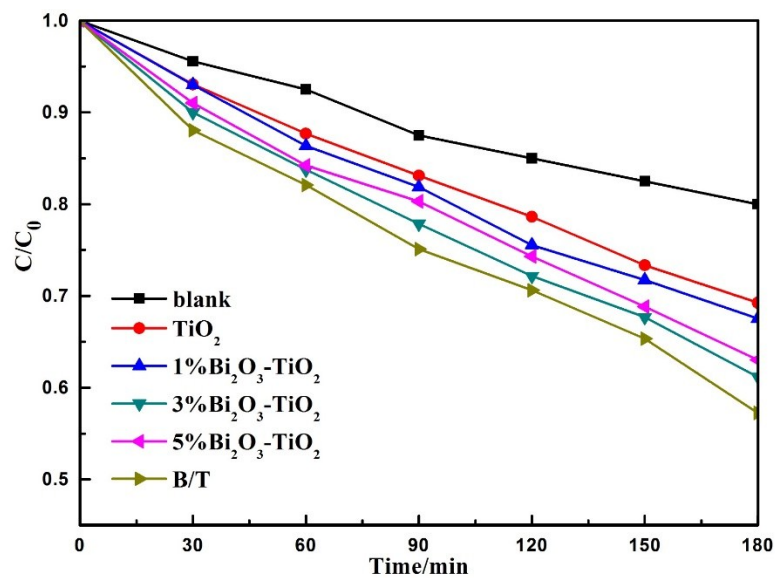

Fig. S6 Photocatalytic activity of thin films for degradation of methyl orange under UV irradiation.
